# Supplementary material for: A facile solution-processed alumina film as an efficient electron-injection layer for inverted organic light-emitting diodes
Source: Royal Society of Chemistry journal article supplement (doi:10.1039/c3tc32020k), 2013-11-19
Supplement: c3tc32020k.pdf [file c3tc32020k.pdf]

## Electronic Supplementary Information (ESI)

### A facile solution-processed alumina as efficient electron-injection layer for inverted organic light-emitting diodes

Jun Peng,<sup>‡a</sup> Xinxin Wang,<sup>‡a</sup> Jie Liu,<sup>a</sup> Xiaodong Huang,<sup>a</sup> Jing Xiao,<sup>a,b</sup> Sui-Dong Wang,<sup>\*a</sup> Hai-Qiao Wang,<sup>\*a</sup> Wanli Ma<sup>\*a</sup>

<sup>a</sup> Institute of Functional Nano & Soft Materials (FUNSOM) & Collaborative Innovation Center of Suzhou Nano Science and Technology, Soochow University, Suzhou, Jiangsu 215123, P. R. China, Email: hqwang@suda.edu.cn

<sup>b</sup> College of Physics and Electronic Engineering, Taishan University, Taian, Shandong 271021, P. R. China

<sup>‡</sup> These authors contributed equally to this work.

\* Corresponding authors.

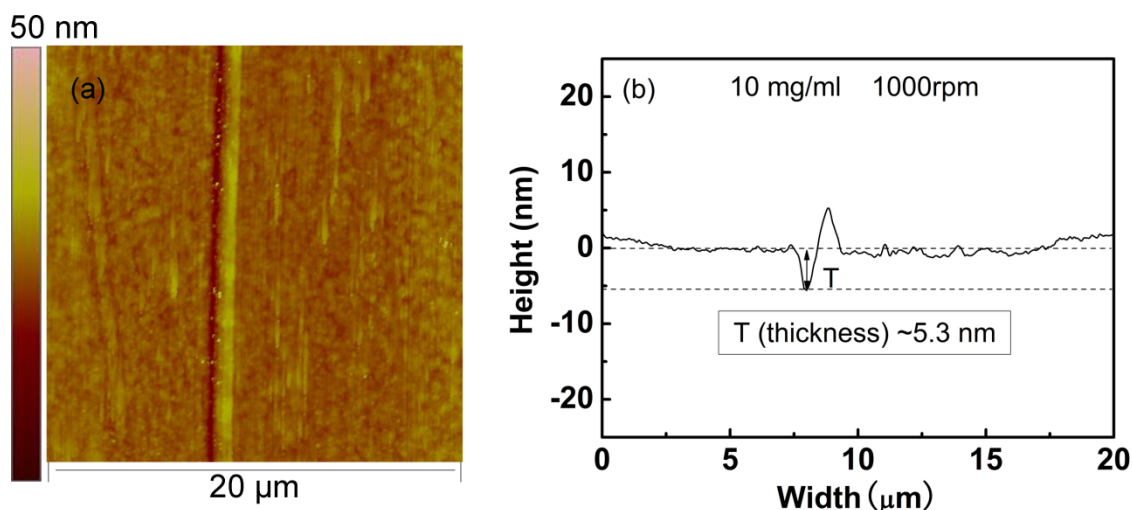

**Fig. S 1** a) Surface morphology of the alumina-coated ITO examined by AFM, image scale: 20 μm×20 μm; b) The corresponding line profiling analysis of the alumina-coated ITO. Fabrication: 10 mg/ml alumina precursor solution, spin-casted at 1000 rpm.

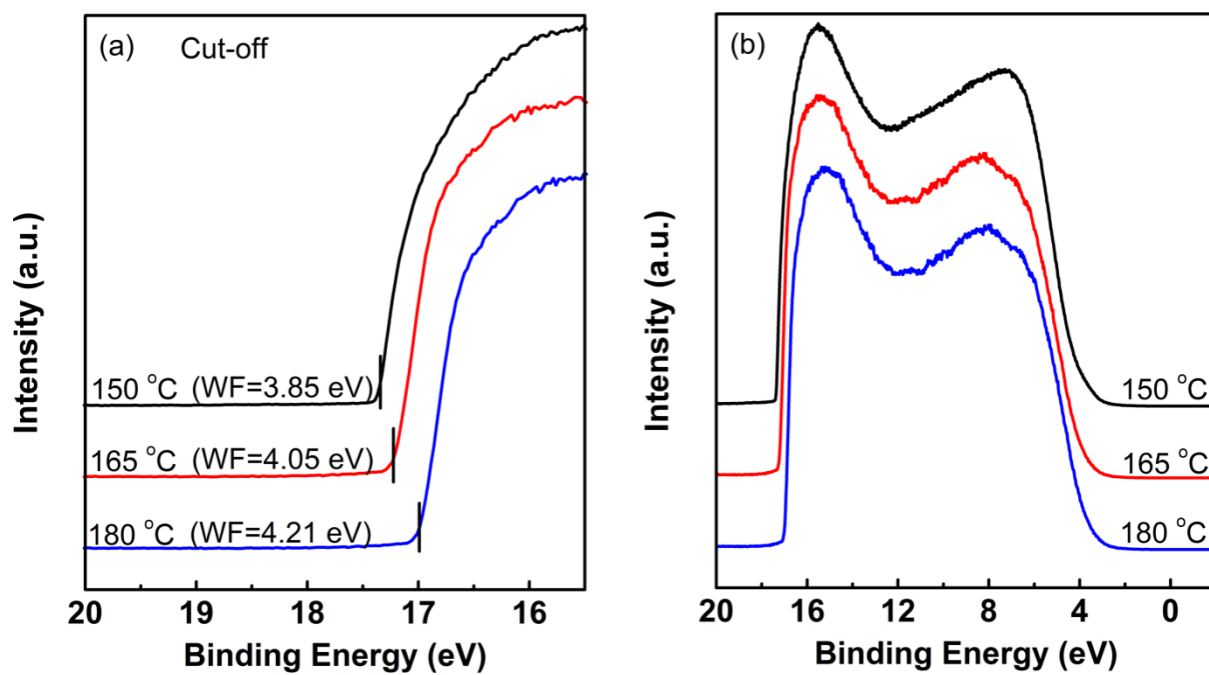

**Fig. S 2** a) UPS spectra of ultra-thin alumina-coated ITO as a function of the annealing temperatures; b) UPS full spectra.

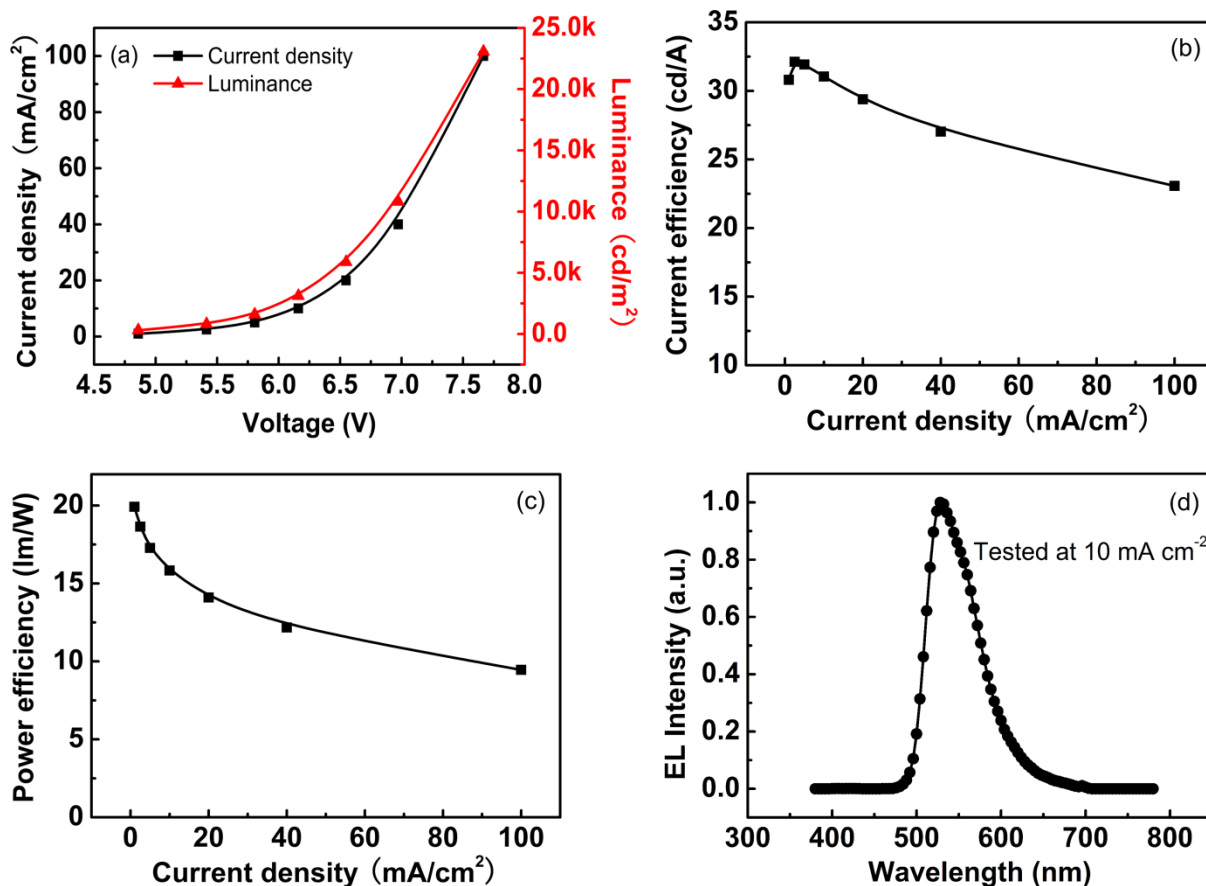

**Fig. S 3** Characteristics of a) current density-voltage and luminance-voltage; b) current efficiency-current density; c) power efficiency-current density and d) electroluminescence spectra in the green phosphorescent IOLEDs. Device structure: ITO/Alumina/BPhen:LiF(5nm)/CBP: Ir(ppy)<sub>2</sub>(acac)(30nm)/TCTA(30nm)/MoO<sub>3</sub>(10nm)/Al. The doping concentration of Ir(ppy)<sub>2</sub>(acac) in CBP is about 7% (v/v).
